# Supplementary material for: Addressing Literacy and Numeracy to Improve Diabetes Care
Source: Oxford University Press journal article supplement (doi:10.2337/dc09-0563), 2009-09-09
Supplement: dc090563-sup-cavanaugh_dlnet_suppltable.doc [file dc090563-sup-cavanaugh_dlnet_suppltable.doc]

Supplementary Table A1. Comparison of enhanced diabetes care program in intervention and control groups.

| **Intervention** | **Control** |
| --- | --- |
| Nurse practitioner or PharmD/CDE visits (1-3) | Nurse practitioner/CDE visits (1-3) |
| Dietician/CDE visits (1-3) | Dietician/CDE visits (1-3) |
| **Provider clear health communication training** |  |
| **Diabetes Literacy & Numeracy Education Toolkit (DLNET)** | Usual diabetes patient education materials |
| Usual care from primary care or endocrine physician | Usual care from primary care or endocrine physician |
